# Supplementary material for: c-Axis-penetrated mesoporous MWW zeolite nanosheets: preparation by H2O2-induced micro-explosion and their enhanced properties
Source: Royal Society of Chemistry journal article supplement (doi:10.1039/d2qi00928e), 2022-01-01
Supplement: d2qi00928e1.pdf [file d2qi00928e1.pdf]

## Supporting Information

### **H<sub>2</sub>O<sub>2</sub>-Induced Micro-explosion Preparation of Highly-dispersed and Porous MWW Oligolayers and Their properties**

Chunna Zhang <sup>a</sup>, Feng Lin <sup>a</sup>, Lingtao Kong <sup>a</sup>, Zhaoqi Ye <sup>a</sup>, Di Pan <sup>a</sup>, Hongbin Li <sup>a</sup>, He Li <sup>a</sup>, Peng Liu <sup>a</sup>, Yahong Zhang <sup>a</sup>, Hongbin Zhang <sup>b,\*</sup>, and Yi Tang <sup>a,\*</sup>

*<sup>a</sup> Department of Chemistry, Laboratory of Advanced Materials, Collaborative Innovation Center of Chemistry for Energy Materials and Shanghai Key Laboratory of Molecular Catalysis and Innovative Materials, Fudan University, Shanghai 200433, China.*

*<sup>b</sup> Institute for Preservation of Chinese Ancient Books, Fudan University Library, Fudan University, Shanghai 200433, China.*

\* Corresponding author.

Prof. Yi Tang, Email address: yitang@fudan.edu.cn

Dr. Hongbin Zhang, Email address: zhanghongbin@fudan.edu.cn

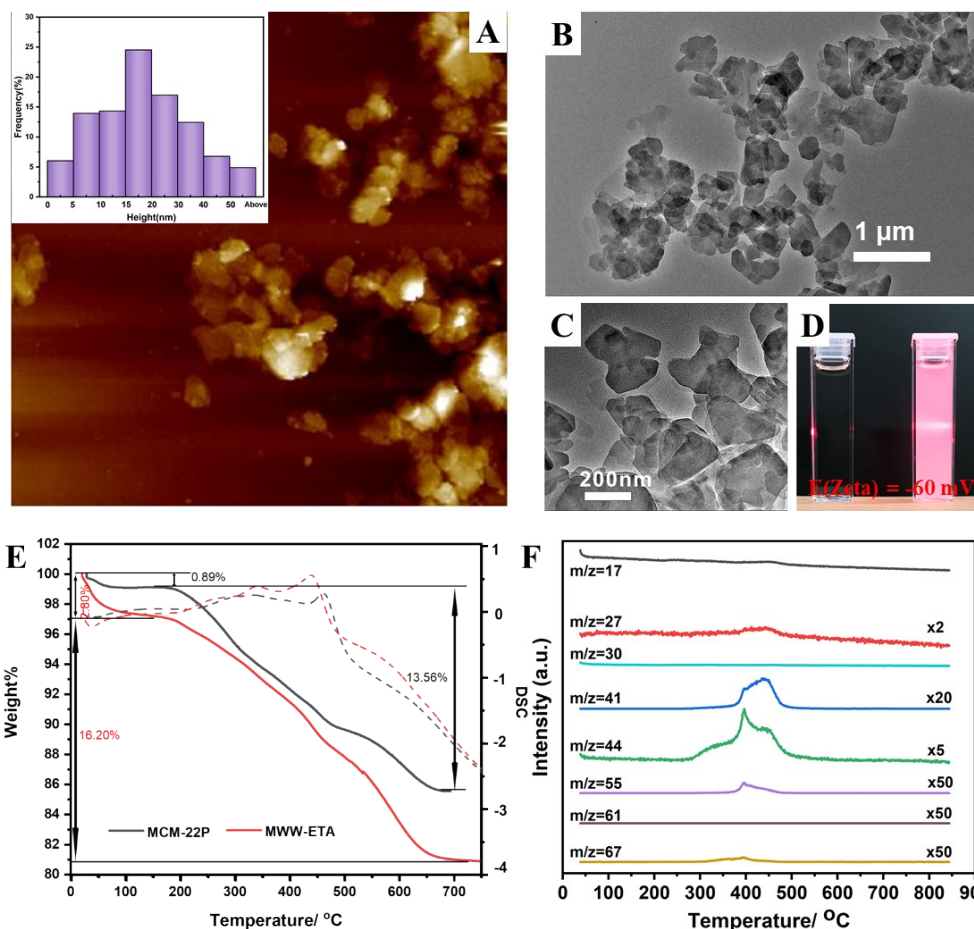

**Figure S1.** Features of the obtained MWW-ETA. **A**, AFM image shows the average thickness is about 15-20 nm. **B** and **C**, TEM images indicate its discrete, tiled oligolayers. **D**, The obvious Tyndall effect indicates excellent dispersity. **E**, TGA and DSC curves of MCM-22P and MWW-ETA in air. The introduction of ETA leads to an increased weight loss of MWW-ETA. **F**, MS spectra of MWW-ETA.  $m/z=17$ , 27, 30, 61 are characteristic signals for ETA different from HMI. Both ETA and HMI have a relatively strong interaction with MWW nanosheets.

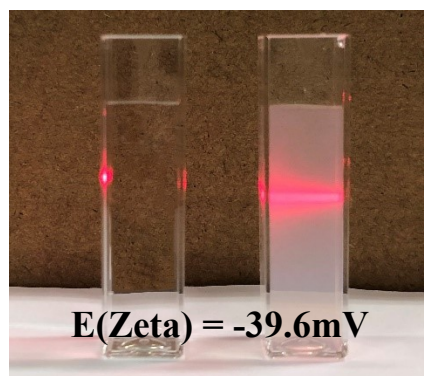

**Figure S2.** The Tyndall effect and Zeta potential for MWW-ME(4) suspension (Left one:  $H_2O$ ).

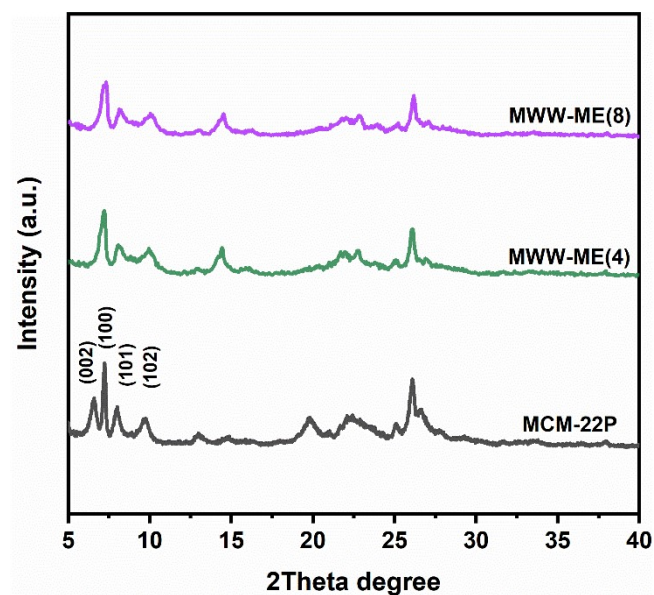

**Figure S3.** XRD patterns of MCM-22P and MWW-ME(x) samples.

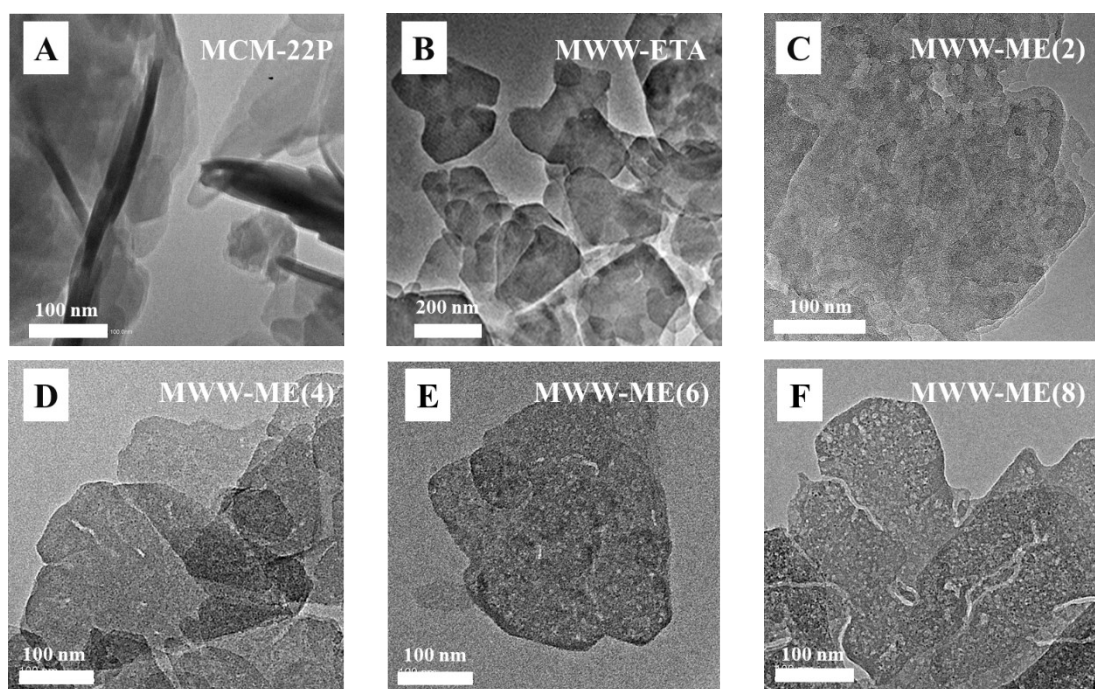

**Figure S4.** TEM images of MCM-22P (A), MWW-ETA (B), and MWW-ME (C-F) zeolites nanosheets.

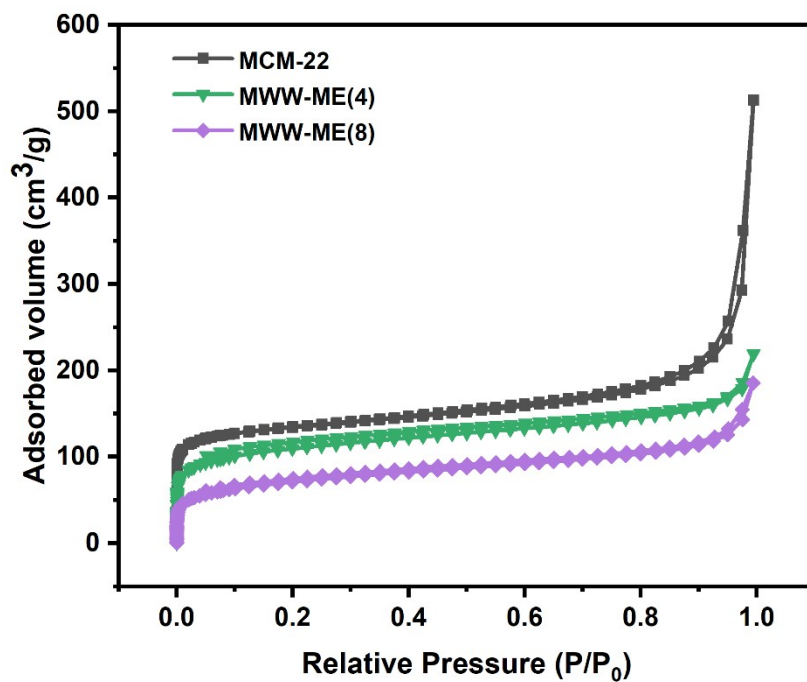

**Figure S5.** Ar adsorption-desorption isotherms of MCM-22 (gray line) and MWW-ME(x).

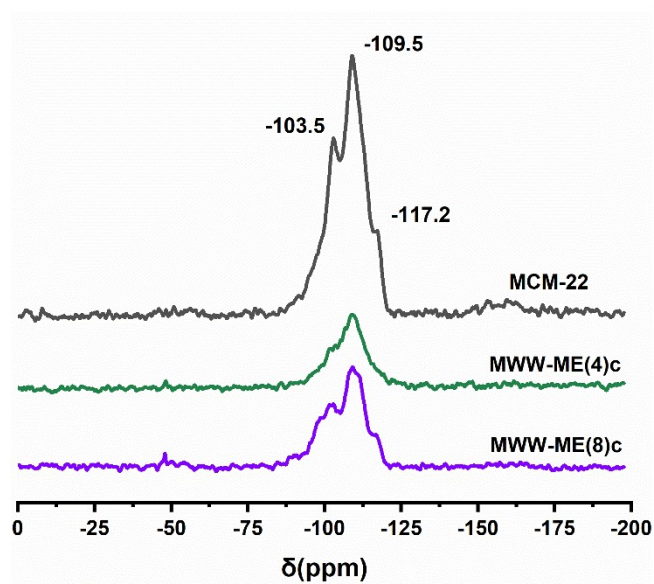

**Figure S6.** Solid-state <sup>29</sup>Si MAS NMR for MCM-22 (gray line) and MWW-ME(x).

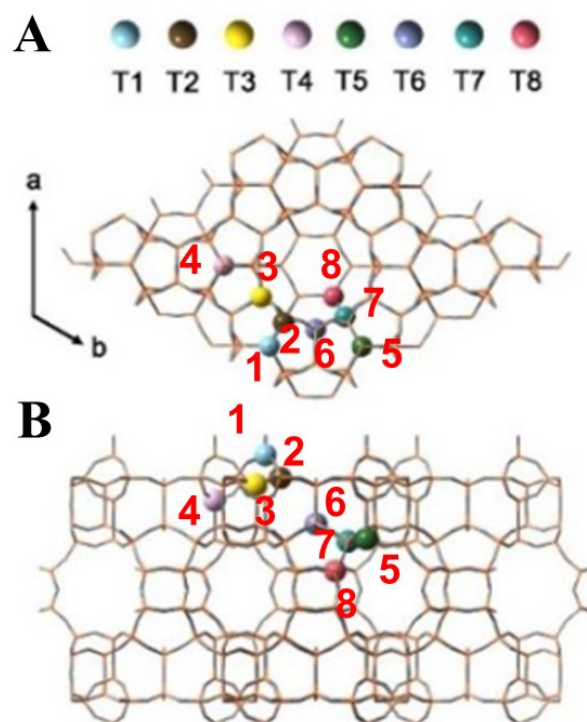

**Figure S7.** Eight different T sites in MWW framework. (A), along [001]direction. (B), along [100] direction<sup>1</sup>.

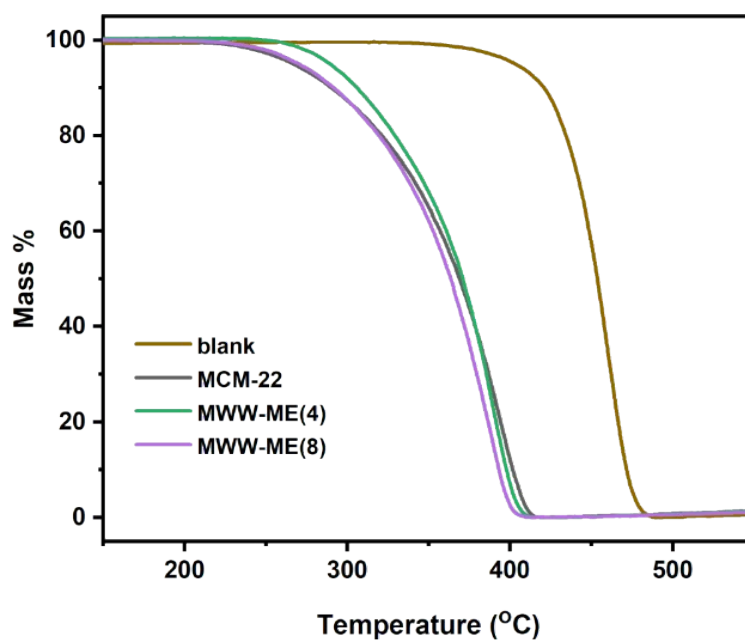

**Figure S8.** Mass loss curves of PP at temperature program process.

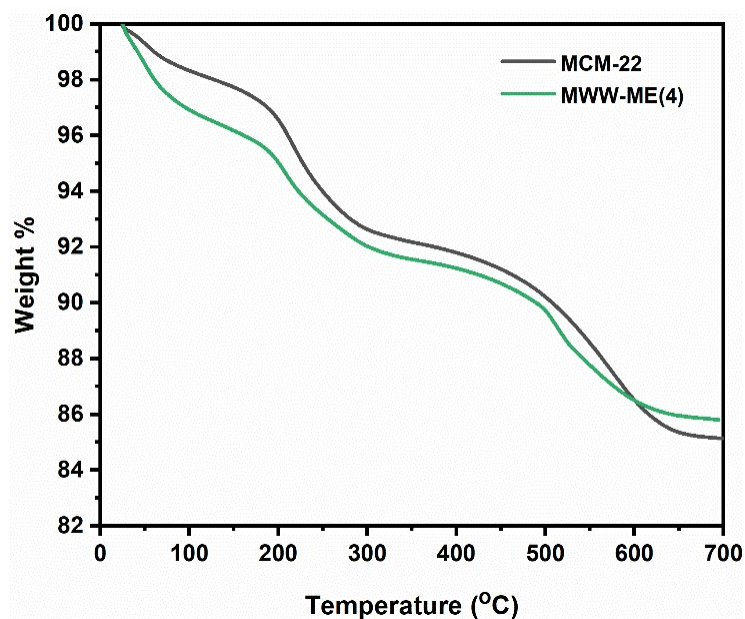

**Figure S9.** The TG curves of MCM-22 and MWW-ME(4) in the air after the alkylation reaction of mesitylene with benzyl alcohol (BzOH).

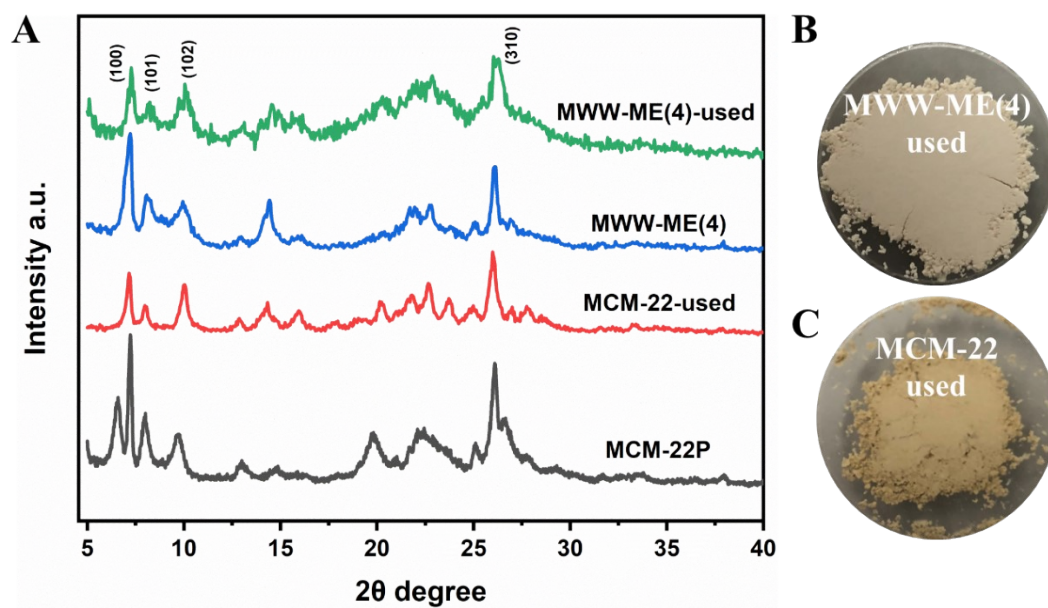

**Figure S10.** XRD patterns (A) and optical photos of the used MCM-22 (B) and used MWW-ME(4) (C).

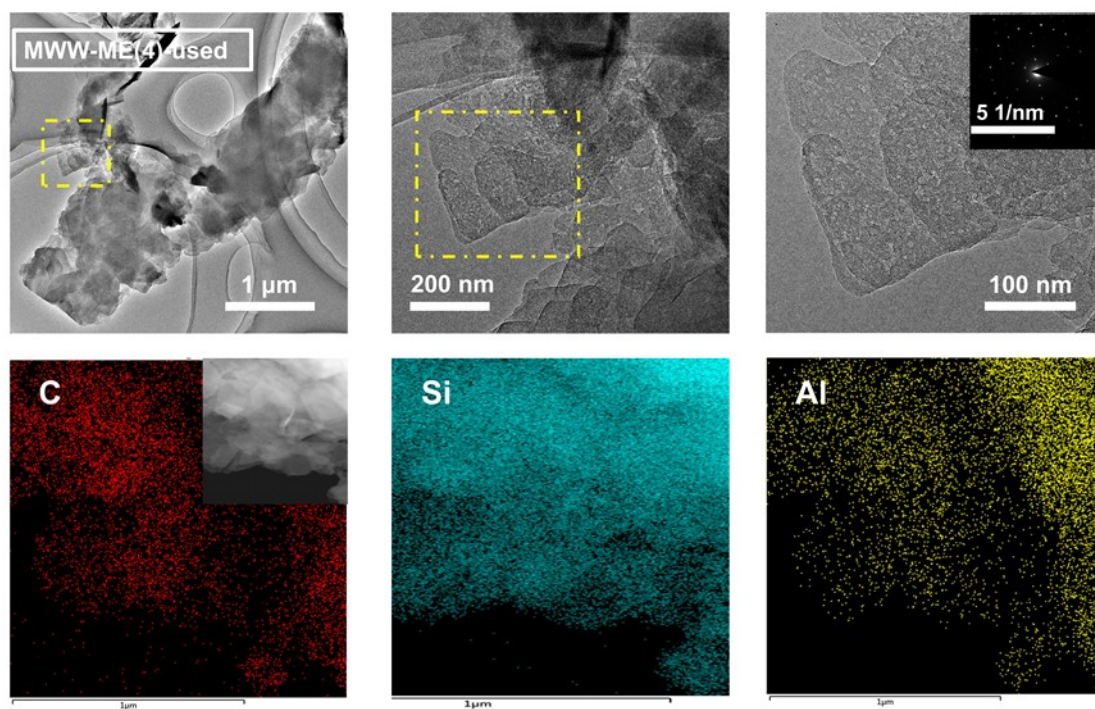

**Figure S11.** TEM images and EDS Mapping of MWW-ME(4)-used.

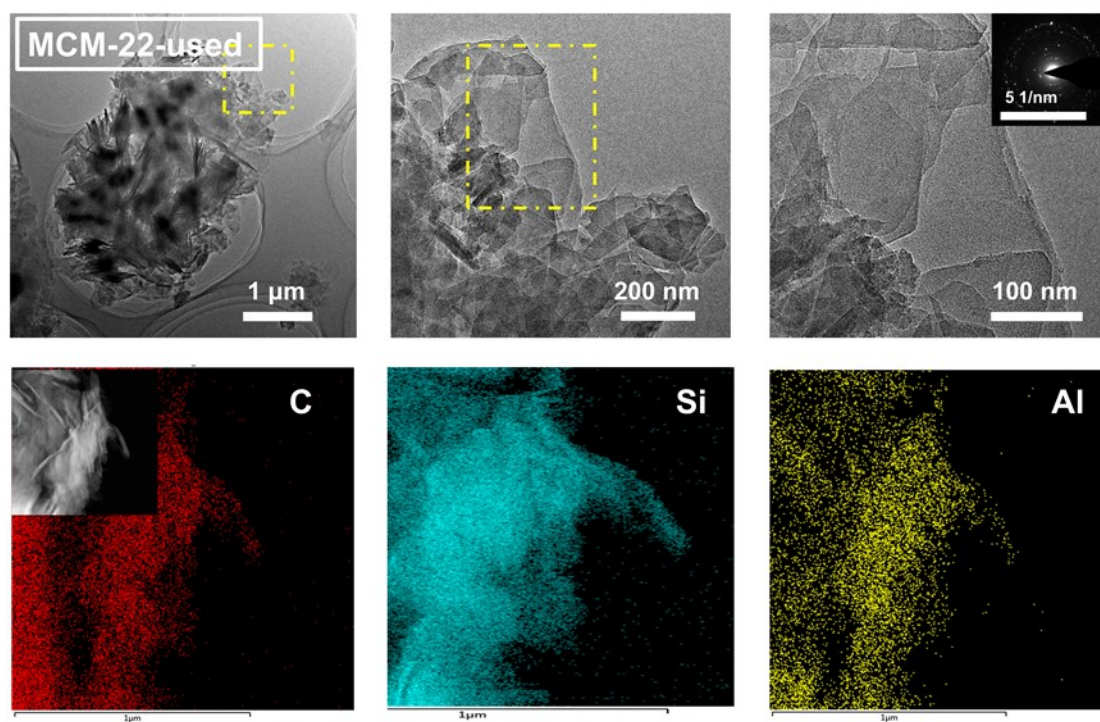

**Figure S12.** TEM images and EDS Mapping of MCM-22-used.

**Table S1.** The results of NH<sub>3</sub>-TPD tests.

|                     | <b>LT</b><br><b>(mmol/g)</b> | <b>HT</b><br><b>(mmol/g)</b> | <b>Total</b><br><b>(mmol/g)</b> | <b>s/w</b> |
|---------------------|------------------------------|------------------------------|---------------------------------|------------|
| <b>MCM-22-ex</b>    | 0.40                         | 0.28                         | 0.68                            | 0.70       |
| <b>MWW-ME(4)-ex</b> | 0.36                         | 0.31                         | 0.67                            | 0.86       |
| <b>MWW-ME(4)</b>    | 0.41                         | 0.34                         | 0.75                            | 0.83       |

## References

- (1) Zhou, Y.; Mu, Y.; Hsieh, M. F.; Kabius, B.; Pacheco, C.; Bator, C.; Rioux, R. M.; Rimer, J. D. Enhanced Surface Activity of MWW Zeolite Nanosheets Prepared via a One-Step Synthesis. *J Am Chem Soc.* 2020, **142**, 8211-8222.
